# Supplementary material
Source: Royal Society of Chemistry journal article supplement (doi:10.1039/d5dt02864g)
Supplement: d5dt02864g1.pdf [file d5dt02864g1.pdf]

## **Supporting Information**

### **Novel "Turn-Off" and "Turn-On" Fluorescent Responses for Zr<sup>4+</sup> Enabled by Rare-Earth Coordination Polymers Based on the 2,5-Dihydroxyterephthalic Acid Ligand**

Yan Liu,<sup>‡a</sup> Wanting Chen,<sup>‡a</sup> Bobi Zheng<sup>a</sup>, Han Xu,<sup>b</sup> and Jumei Tian<sup>\*a</sup>

<sup>a</sup> Engineering Research Center of Stomatological Biomaterials, Fujian Province University, School of Stomatology of Xiamen Medical College, Xiamen, Fujian 361023, China.

<sup>b</sup> Yunnan Key Laboratory of Pharmacology for Natural Products, School of Pharmaceutical Science, Kunming Medical University, Kunming, Yunnan 650500, China.

<sup>‡</sup> Yan Liu and Wanting Chen contributed equally to this work.

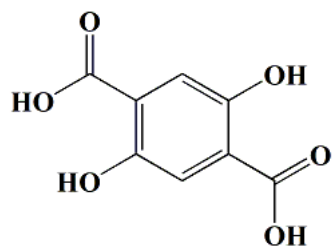

**2,5-Dihydroxyterephthalic acid  
(H<sub>4</sub>dhtp)**

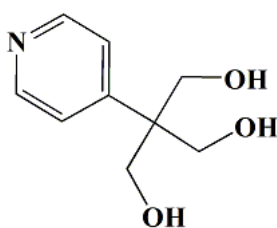

**4-(tris(hydroxymethyl)methyl)pyridine  
(4-thmpyH<sub>3</sub>)**

**Scheme S1** The ligands using in this system. 2,5-Dihydroxyterephthalic acid (abbreviated H<sub>4</sub>dhtp); 4-(tris(hydroxymethyl)methyl)pyridine (abbreviated 4-thmpyH<sub>3</sub>).

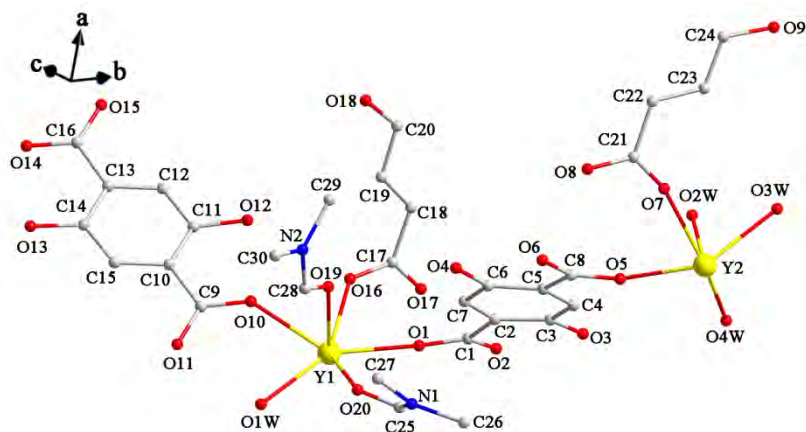

**Fig. S1** Ball-and-stick representation of the asymmetric unit for complex **1**. Hydrogen atoms and the crystalline solvent (N, N-dimethylformamide (DMF) and H<sub>2</sub>O) have been omitted for clarity.

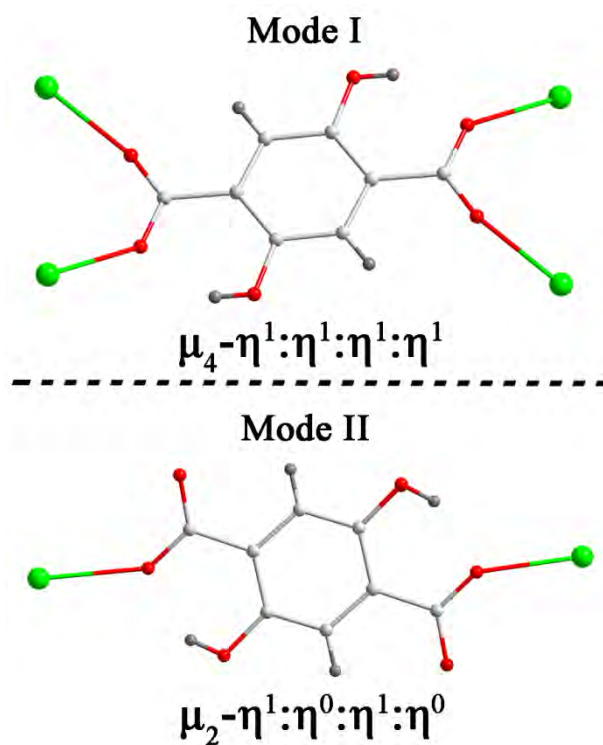

**Fig. S2** The coordination modes of the H<sub>2</sub>dhtp<sup>2-</sup> linker for **1**.

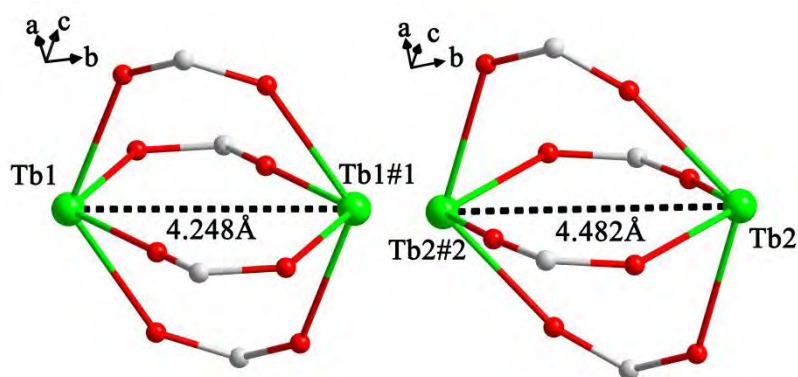

**Fig. S3** The H<sub>2</sub>dhtp<sup>2-</sup> ligands of **1** through coordination mode I. #1: -x,1-y,1-z; #2: 1-x,1-y,-z.

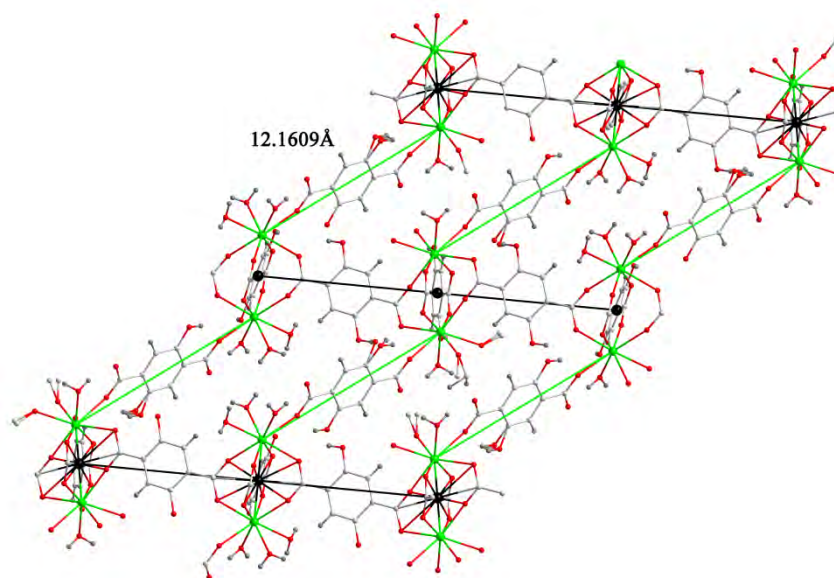

**Fig. S4** The view of the 3D framework structure linked the diamond shaped layer by H<sub>2</sub>dhtp<sup>2-</sup> ligand through mode II along *a* axle for **1**.

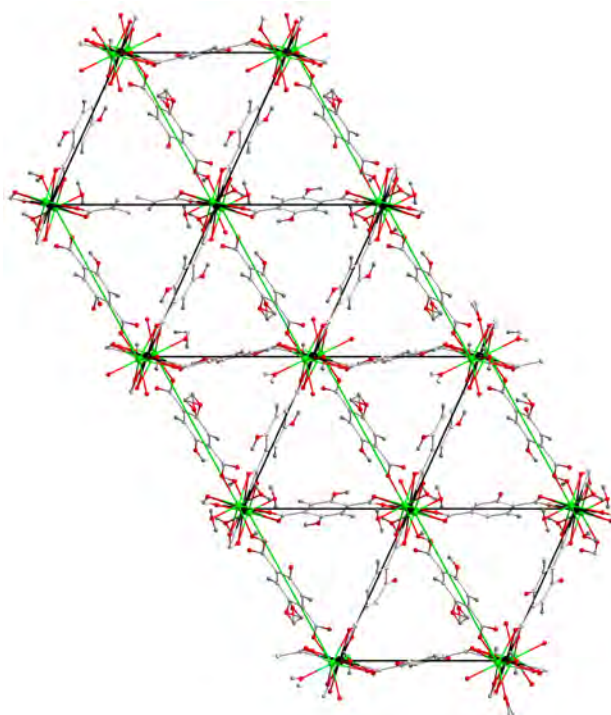

**Fig. S5** The view of the 3D framework structure linked the diamond shaped layer by H<sub>2</sub>dhtp<sup>2-</sup> ligand through mode II along *b* axle for **1**.

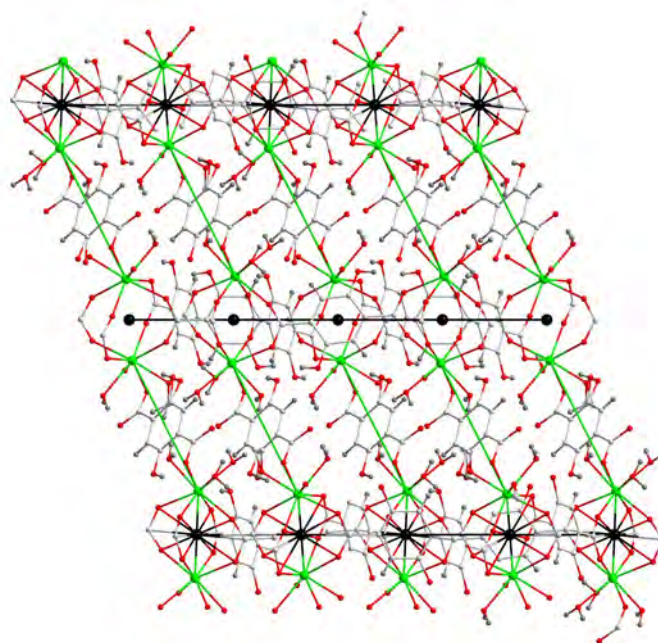

**Fig. S6** The view of the 3D framework structure linked the diamond shaped layer by  $\text{H}_2\text{dhtp}^{2-}$  ligand through mode II along  $c$  axle for **1**.

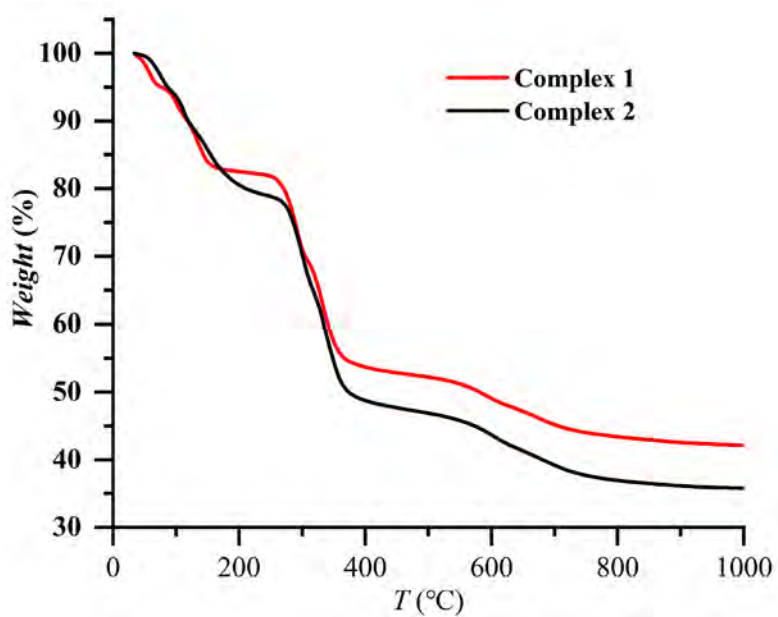

**Fig. S7** The TGA curves of **1** (red) and **2** (black).

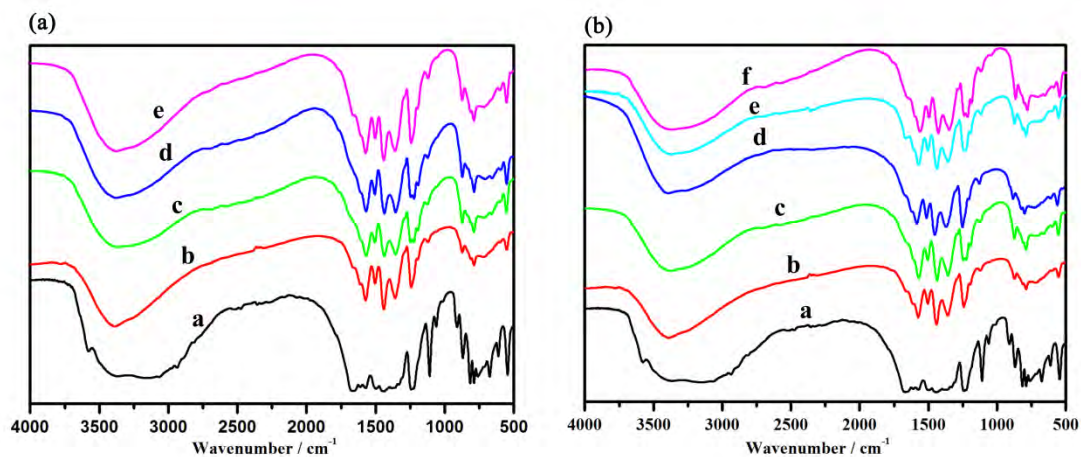

**Fig. S8** The IR spectrums for **1** in KBr pellets from 4000  $\text{cm}^{-1}$  to 450  $\text{cm}^{-1}$ .

(a) a: the as-synthesised sample; b: after dispersed in water with ultrasound for 30 min; c: after soaking in 10 $\mu\text{M}$   $\text{Fe}^{3+}$  solution; d: after soaking in 100 $\mu\text{M}$   $\text{Fe}^{3+}$  solution; e: after soaking in 400 $\mu\text{M}$   $\text{Fe}^{3+}$  solution.

(b) a: as-synthesised sample; b: after dispersed in water with ultrasound for 30 min; c: after soaking in 5 $\mu\text{M}$   $\text{Zr}^{4+}$  solution; d: after soaking in 100 $\mu\text{M}$   $\text{Zr}^{4+}$  solution; e: after soaking in 400 $\mu\text{M}$   $\text{Zr}^{4+}$  solution; f: after soaking in 700 $\mu\text{M}$   $\text{Zr}^{4+}$  solution.

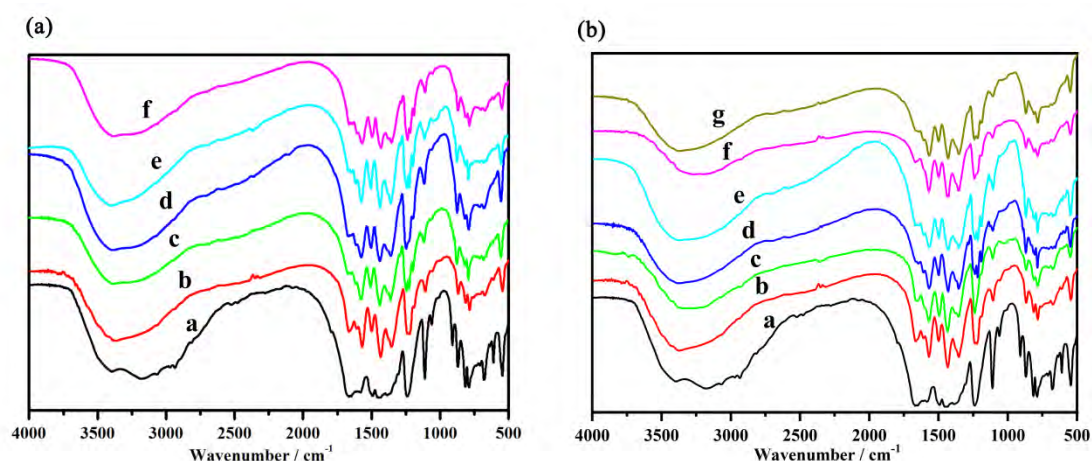

**Fig. S9** The IR spectrums for **2** in KBr pellets from  $4000\text{ cm}^{-1}$  to  $450\text{ cm}^{-1}$ .

(a) a: the as-synthesised sample; b: after dispersed in water with ultrasound for 30 min; c: after soaking in  $23.8\mu\text{M Fe}^{3+}$  solution; d: after soaking in  $47.6\mu\text{M Fe}^{3+}$  solution; e: after soaking in  $95.2\mu\text{M Fe}^{3+}$  solution; f: after soaking in  $381\mu\text{M Fe}^{3+}$  solution. (b) a: the as-synthesised sample; b: after dispersed in water with ultrasound for 30 min; c: after soaking in  $10\mu\text{M Zr}^{4+}$  solution; d: after soaking in  $60\mu\text{M Zr}^{4+}$  solution; e: after soaking in  $90\mu\text{M Zr}^{4+}$  solution; f: after soaking in  $300\mu\text{M Zr}^{4+}$  solution; g: after soaking in  $500\mu\text{M Zr}^{4+}$  solution.

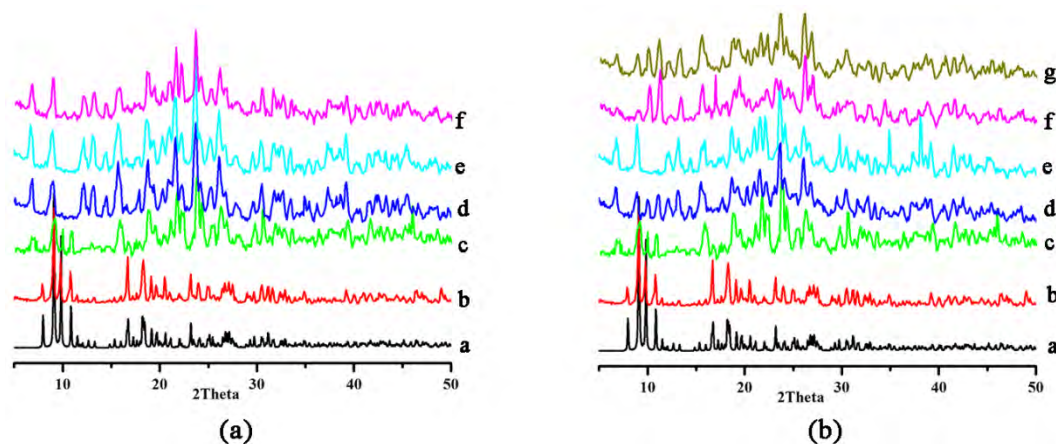

**Fig. S10** The Powder X-ray diffraction (PXRD) patterns for **1**. (a) a: the simulated pattern from single crystal X-ray data; b: the experimental pattern at room temperature; c: after dispersed in water with ultrasound for 30 min; d: after soaking in  $10\mu\text{M Fe}^{3+}$  solution; e: after soaking in  $100\mu\text{M Fe}^{3+}$  solution; f: after soaking in  $400\mu\text{M Fe}^{3+}$  solution. (b) a: the simulated pattern from single crystal X-ray data; b: the experimental pattern at room temperature; c: after dispersed in water with ultrasound for 30 min; d: after soaking in  $5\mu\text{M Zr}^{4+}$  solution; e: after soaking in

100 $\mu\text{M}$   $\text{Zr}^{4+}$  solution; f: after soaking in 400 $\mu\text{M}$   $\text{Zr}^{4+}$  solution; g: after soaking in 700 $\mu\text{M}$   $\text{Zr}^{4+}$  solution.

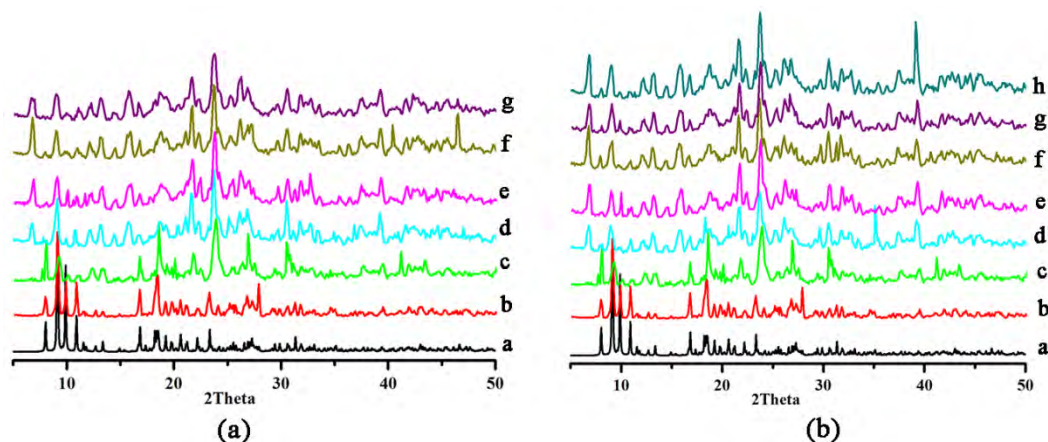

**Fig. S11** The Powder X-ray diffraction (PXRD) patterns for **2**. (a) a: the simulated pattern from single crystal X-ray data; b: the experimental pattern at room temperature; c: after dispersed in water with ultrasound for 30 min; d: after soaking in 23.8 $\mu\text{M}$   $\text{Fe}^{3+}$  solution; e: after soaking in 47.6 $\mu\text{M}$   $\text{Fe}^{3+}$  solution; f: after soaking in 95.2 $\mu\text{M}$   $\text{Fe}^{3+}$  solution; g: after soaking in 381 $\mu\text{M}$   $\text{Fe}^{3+}$  solution. (b) a: the simulated pattern from single crystal X-ray data; b: the experimental pattern at room temperature; c: after dispersed in water with ultrasound for 30 min; d: after soaking in 10 $\mu\text{M}$   $\text{Zr}^{4+}$  solution; e: after soaking in 60 $\mu\text{M}$   $\text{Zr}^{4+}$  solution; f: after soaking in 90 $\mu\text{M}$   $\text{Zr}^{4+}$  solution; g: after soaking in 300 $\mu\text{M}$   $\text{Zr}^{4+}$  solution; h: after soaking in 500 $\mu\text{M}$   $\text{Zr}^{4+}$  solution.

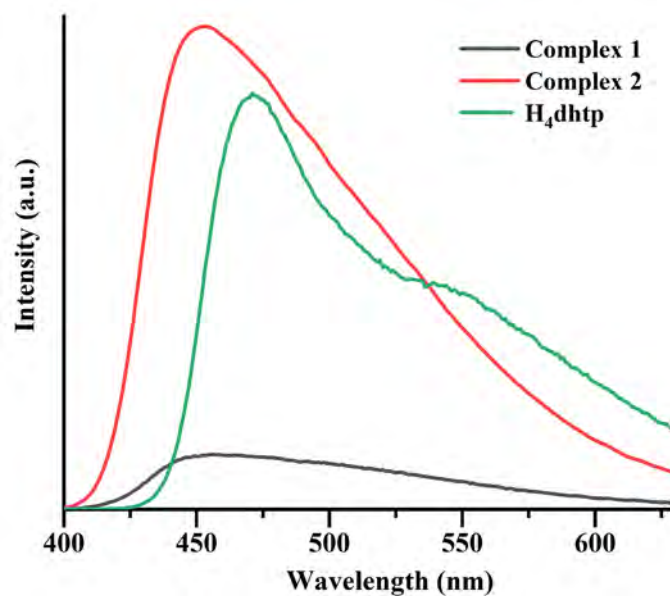

**Fig. S12** The solid-state emission spectra of H<sub>4</sub>dhtp, complex 1 and complex 2 at excitation of 380, 330, and 320 nm, respectively.

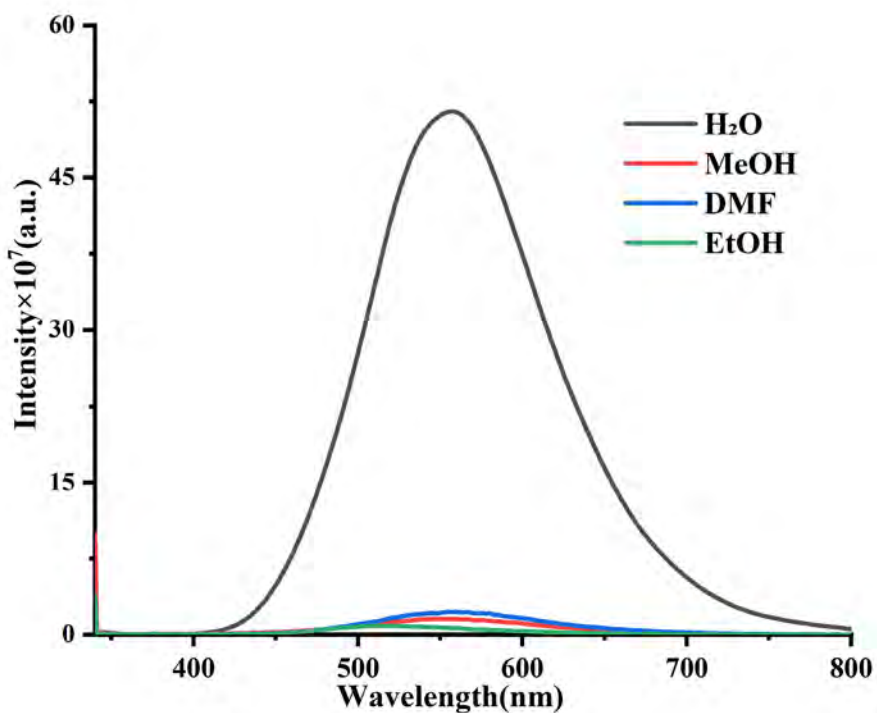

**Fig. S13** The emission spectra of complex 1 dispersed in different solvents at excitation of 340 nm.

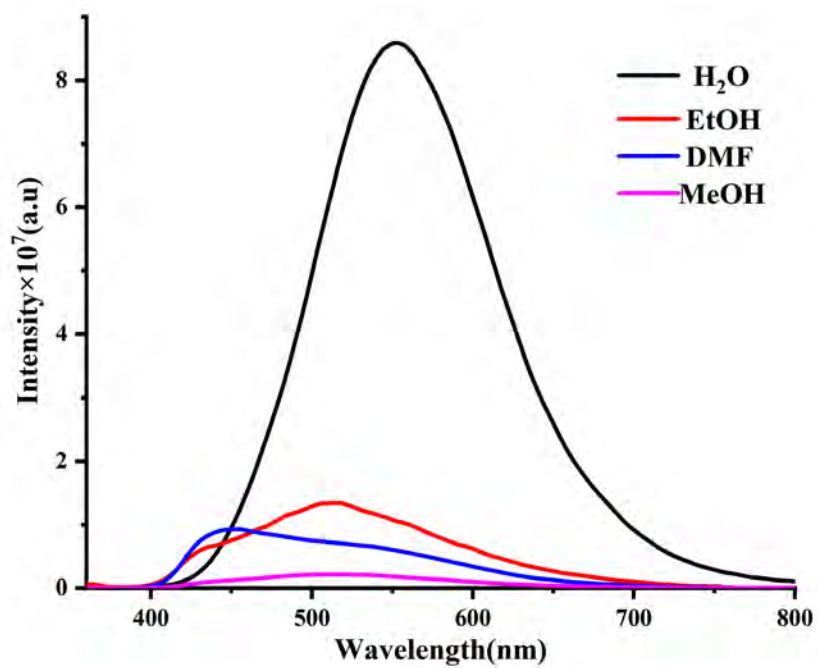

**Fig. S14** The emission spectra of complex **2** dispersed in different solvents at excitation of 330 nm.

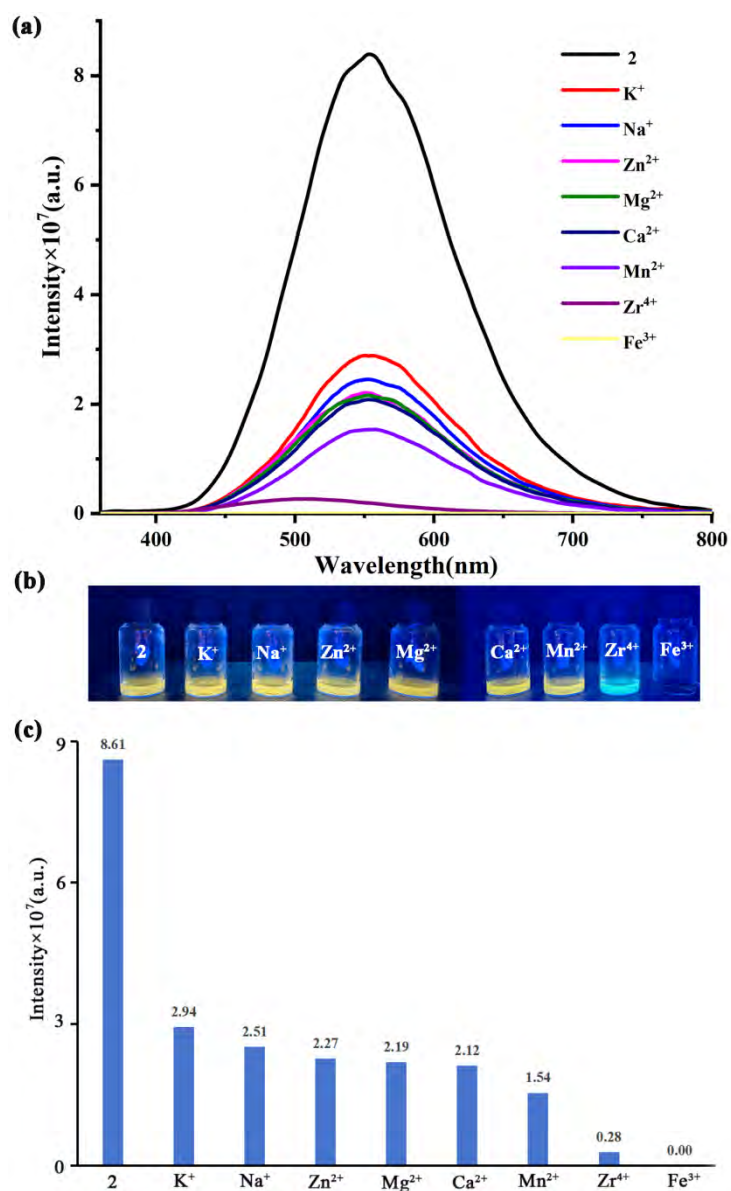

**Fig. S15** (a) The emission spectra of complex **2** dispersed in different cations in  $H_2O$  at excitation of 330 nm. (b) The photographic images of complex **2** dispersed in different cation solutions. (c) Fluorescence intensities of complex **2** in different cations in  $H_2O$ .

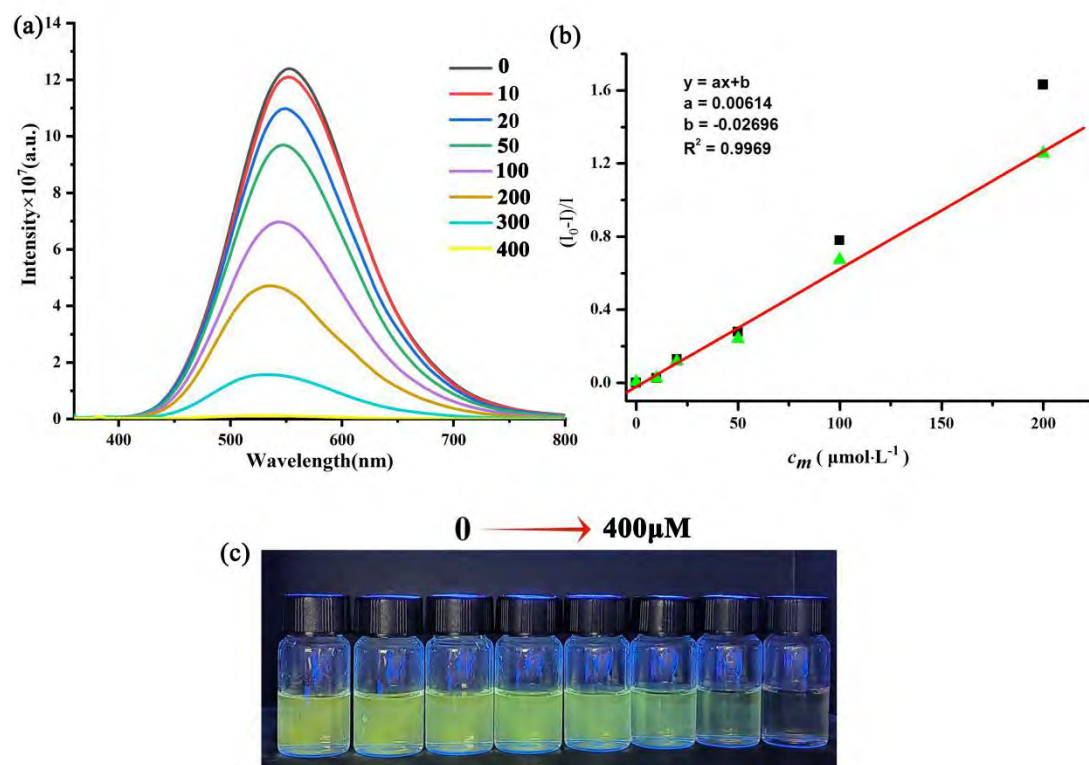

**Fig. S16** (a) Fluorescence spectra of **1** dispersed in water after adding different concentration of  $\text{Fe}^{3+}$  ion solution ( $\mu\text{M}$ ). (b) the SV plot for fluorescence intensity of **1** vs concentration of  $\text{Fe}^{3+}$  ion: black) before inner-filter correction; green) after inner-filter correction; red) the fitting for the corrected curve. (c) The photographic images of complex **1** dispersed in different concentration of  $\text{Fe}^{3+}$  ion solution.

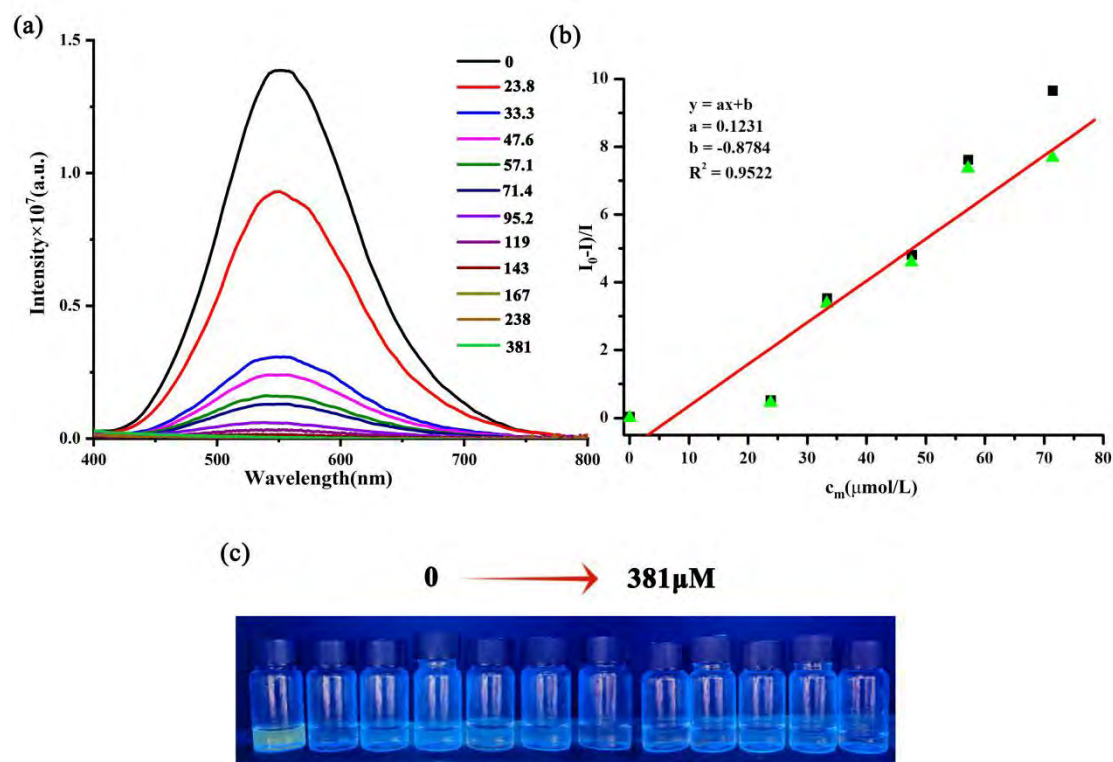

**Fig. S17** (a) Fluorescence spectra of **2** dispersed in water after adding different concentration of  $\text{Fe}^{3+}$  ion solution ( $\mu\text{M}$ ); (b) the SV plot for fluorescence intensity of **2** vs concentration of  $\text{Fe}^{3+}$  ion: black) before inner-filter correction; green) after inner-filter correction; red) the fitting for the corrected curve. (c) The photographic images of complex **2** dispersed in different concentration of  $\text{Fe}^{3+}$  ion solution.

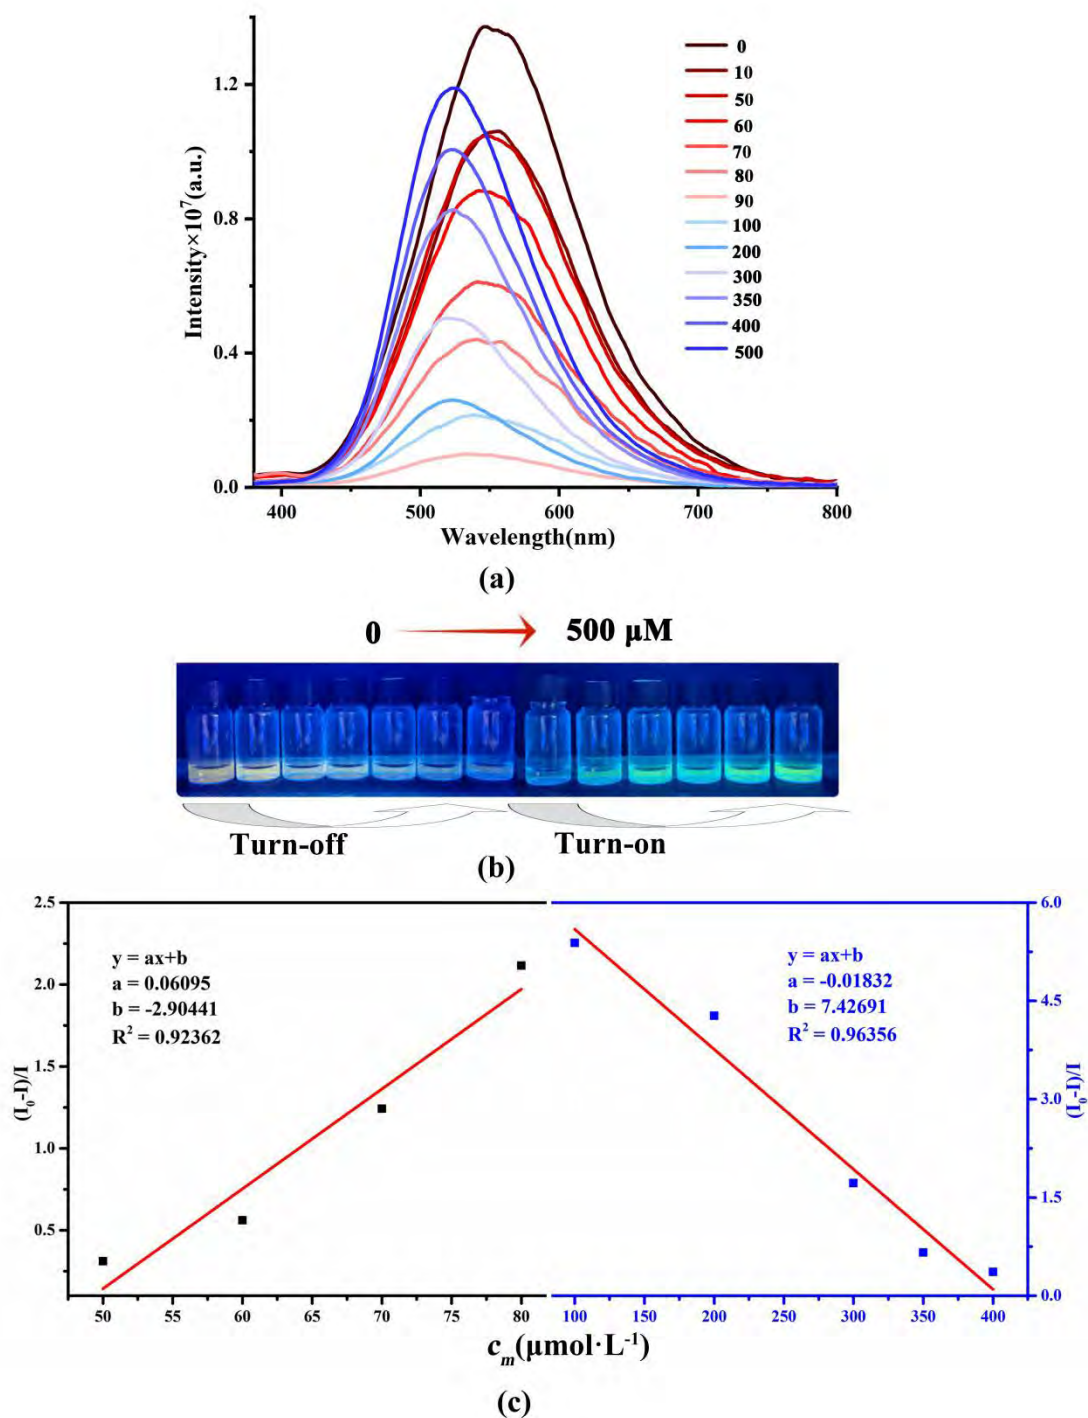

**Fig. S18** (a) The emission spectra of complex **2** dispersed in different concentration of  $Zr^{4+}$  ion solution ( $\mu M$ ) at excitation of 330 nm; (b) photos showing the turn-off and turn-on fluorescence triggered by the different volumes of  $Zr^{4+}$  ion solution; (c) the SV plot for fluorescence intensity of **2** vs concentration of  $Zr^{4+}$  ion.

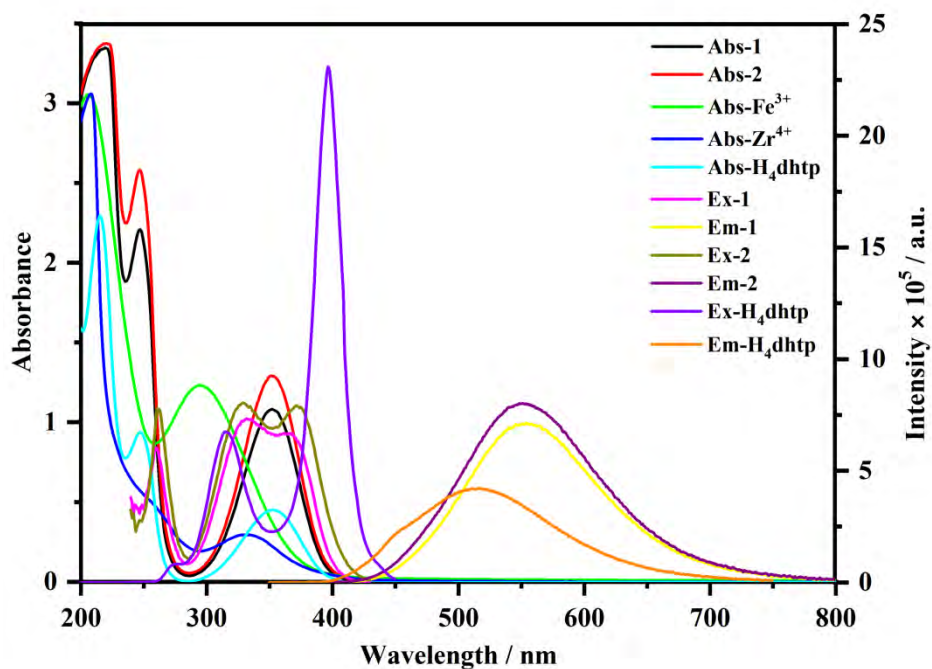

**Fig. S19** The UV-Vis curves of Fe<sup>3+</sup> ion, and Zr<sup>4+</sup> ion. The UV-Vis, excitation spectra and emission spectra of the solution of **1**, **2**, H<sub>4</sub>dhtp ligand, Fe<sup>3+</sup> ion, and Zr<sup>4+</sup> ion.

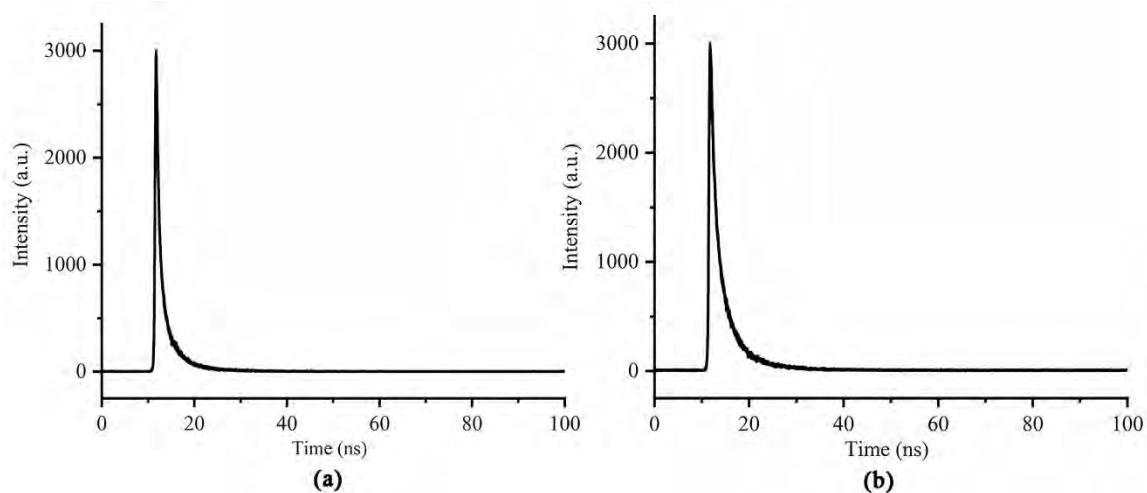

**Fig. S20** Decay curves of **1** (a) and **2** (b) in the solid-state.

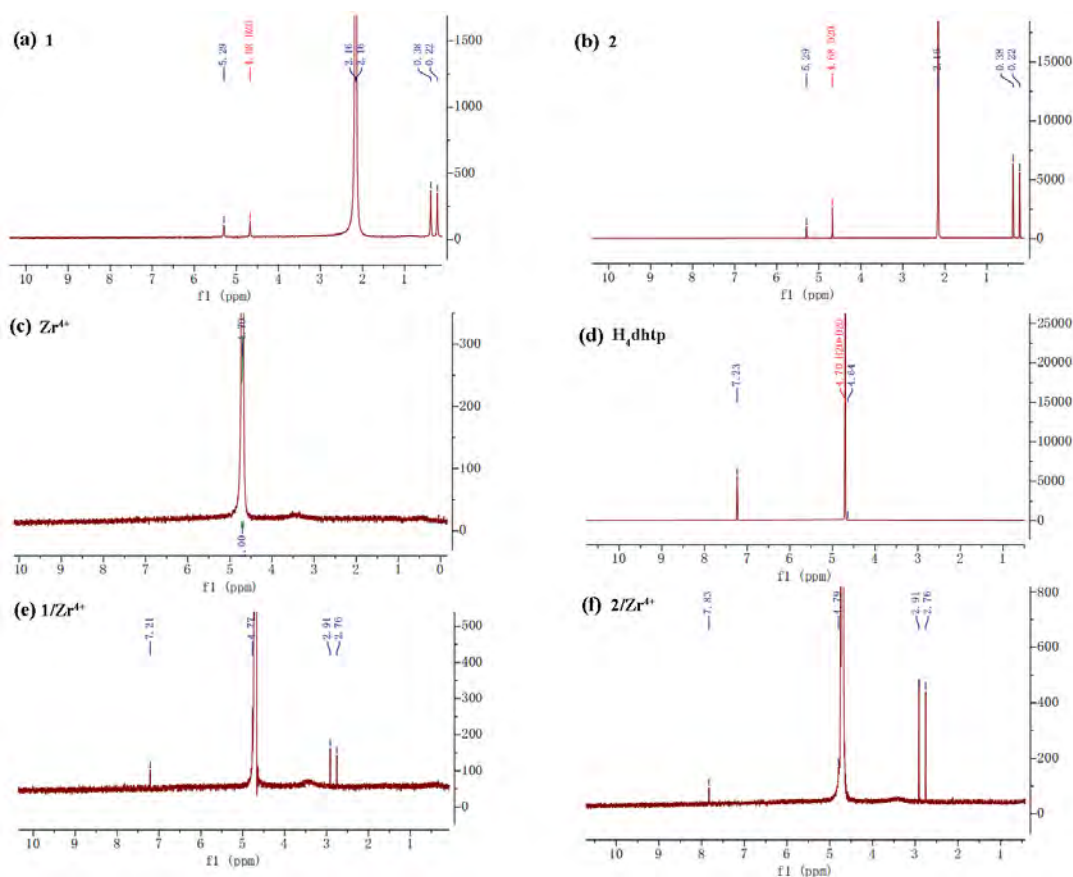

**Fig. S21** The  $^1\text{H}$  NMR spectrum (400 MHz, in  $\text{D}_2\text{O}$ ): (a) **1** in  $\text{D}_2\text{O}$ ; (b) **2** in  $\text{D}_2\text{O}$ ; (c) the  $\text{Zr}^{4+}$  in  $\text{D}_2\text{O}$ ; (d) the ligand  $\text{H}_4\text{dhtp}$  in  $\text{D}_2\text{O}$ ; (e) **1** treated with a  $\text{D}_2\text{O}$  solution of  $\text{Zr}^{4+}$  ion (700  $\mu\text{M}$ ); (f) **2** treated with a  $\text{D}_2\text{O}$  solution of  $\text{Zr}^{4+}$  ion (500  $\mu\text{M}$ ).

**Table S1** The crystallographic data for **1-2**.

|                 | <b>1</b>                                                       | <b>2</b>                                                      |
|-----------------|----------------------------------------------------------------|---------------------------------------------------------------|
| CCDC number     | 2232272                                                        | 2312375                                                       |
| formula         | $\text{C}_{36}\text{H}_{50}\text{N}_4\text{O}_{27}\text{Tb}_2$ | $\text{C}_{36}\text{H}_{50}\text{N}_4\text{O}_{27}\text{Y}_2$ |
| fw              | 1288.66                                                        | 1148.62                                                       |
| space group     | P-1                                                            | P-1                                                           |
| crystal system  | triclinic                                                      | triclinic                                                     |
| $a/\text{\AA}$  | 10.8378(2)                                                     | 10.7730(2)                                                    |
| $b/\text{\AA}$  | 11.3215(2)                                                     | 11.2540(2)                                                    |
| $c/\text{\AA}$  | 19.7056(4)                                                     | 19.6698(4)                                                    |
| $\alpha/^\circ$ | 83.585(2)                                                      | 83.590(2)                                                     |
| $\beta/^\circ$  | 83.958(2)                                                      | 83.845(2)                                                     |
| $\gamma/^\circ$ | 79.708(2)                                                      | 79.622(2)                                                     |

|                                                                                 |                  |                       |
|---------------------------------------------------------------------------------|------------------|-----------------------|
| $V/\text{\AA}^3$                                                                | 2355.07(8)       | 2321.80(8)            |
| <b>Z</b>                                                                        | 2                | 2                     |
| <b>calculated density (g.cm<sup>-3</sup>)</b>                                   | 1.817            | 1.643                 |
| <b>absorption coefficient (<math>\mu</math>,mm<sup>-1</sup>)</b>                | 15.419           | 4.201                 |
| <b>F(000)</b>                                                                   | 1280.0           | 1176.0                |
| <b>crystal size (mm<sup>3</sup>)</b>                                            | 0.3 × 0.2 × 0.1  | 0.304 × 0.185 × 0.111 |
| <b>2<math>\theta</math> range (deg)</b>                                         | 7.972 to 148.718 | 8.022 to 152.478      |
| <b>unique reflns (<math>R_{int}</math>)</b>                                     | 9629(0.0406)     | 9517(0.0293)          |
| <b><math>R_1^a</math>, <math>wR_2^b</math> (<math>I &gt; 2\sigma(I)</math>)</b> | 0.0297, 0.0734   | 0.0274, 0.0663        |
| <b><math>R_1^a</math>, <math>wR_2^b</math> (all data)</b>                       | 0.0340, 0.0758   | 0.0330, 0.0693        |
| <b>GOF on <math>F^2</math></b>                                                  | 1.021            | 1.046                 |

$$^a R_1 = \sum (\|F_o\| - |F_c|) / \sum |F_o|; ^b wR_2 = \left[ \sum w(|F_o|^2 - |F_c|^2)^2 / \sum w(|F_o|^2)^2 \right]^{1/2}.$$

**Table S2** Selected bond lengths (Å) and angles (deg) for **1**.

| Bond lengths [Å]     |           |                      |            |
|----------------------|-----------|----------------------|------------|
| Tb(1)-O(1)           | 2.312(2)  | Tb(2)-O(8)#1         | 2.4010(19) |
| Tb(1)-O(17)#3        | 2.380(2)  | Tb(2)-O(6)#1         | 2.361(2)   |
| Tb(1)-O(16)          | 2.353(2)  | Tb(2)-O(7)           | 2.320(2)   |
| Tb(1)-O(2)#3         | 2.417(2)  | Tb(2)-O(5)           | 2.3088(19) |
| Tb(1)-O(10)          | 2.417(2)  | Tb(2)-O(14)#2        | 2.458(2)   |
| Tb(1)-O(1W)          | 2.386(2)  | Tb(2)-O(2W)          | 2.437(2)   |
| Tb(1)-O(20)          | 2.430(2)  | Tb(2)-O(4W)          | 2.408(2)   |
| Tb(1)-O(19)          | 2.386(2)  | Tb(2)-O(3W)          | 2.360(2)   |
| Angles [deg]         |           |                      |            |
| O(1)-Tb(1)-O(17)#3   | 78.49(8)  | O(8)#1-Tb(2)-O(14)#2 | 73.08(7)   |
| O(1)-Tb(1)-O(16)     | 71.87(8)  | O(8)#1-Tb(2)-O(2W)   | 136.61(8)  |
| O(1)-Tb(1)-O(2)#3    | 121.91(8) | O(8)#1-Tb(2)-O(4W)   | 80.07(8)   |
| O(1)-Tb(1)-O(10)     | 141.11(8) | O(6)#1-Tb(2)-O(8)#1  | 77.68(8)   |
| O(1)-Tb(1)-O(1W)     | 142.41(8) | O(6)#1-Tb(2)-O(14)#2 | 70.76(8)   |
| O(1)-Tb(1)-O(20)     | 76.79(8)  | O(6)#1-Tb(2)-O(2W)   | 143.06(9)  |
| O(1)-Tb(1)-O(19)     | 88.96(9)  | O(6)#1-Tb(2)-O(4W)   | 140.25(8)  |
| O(17)#3-Tb(1)-O(2)#3 | 74.06(8)  | O(7)-Tb(2)-O(8)#1    | 120.73(7)  |
| O(17)#3-Tb(1)-O(10)  | 136.53(8) | O(7)-Tb(2)-O(6)#1    | 73.78(8)   |
| O(17)#3-Tb(1)-O(1W)  | 75.46(8)  | O(7)-Tb(2)-O(14)#2   | 137.61(8)  |
| O(17)#3-Tb(1)-O(20)  | 72.89(8)  | O(7)-Tb(2)-O(2W)     | 75.17(8)   |
| O(17)#3-Tb(1)-O(19)  | 142.61(8) | O(7)-Tb(2)-O(4W)     | 145.75(8)  |
| O(16)-Tb(1)-O(17)#3  | 128.12(7) | O(7)-Tb(2)-O(3W)     | 82.18(9)   |
| O(16)-Tb(1)-O(2)#3   | 86.73(8)  | O(5)-Tb(2)-O(8)#1    | 72.65(8)   |
| O(16)-Tb(1)-O(10)    | 71.68(7)  | O(5)-Tb(2)-O(6)#1    | 119.75(8)  |
| O(16)-Tb(1)-O(1W)    | 145.61(8) | O(5)-Tb(2)-O(7)      | 78.37(8)   |
| O(16)-Tb(1)-O(20)    | 135.69(8) | O(5)-Tb(2)-O(14)#2   | 140.34(8)  |

|                    |           |                     |           |
|--------------------|-----------|---------------------|-----------|
| O(16)-Tb(1)-O(19)  | 78.83(9)  | O(5)-Tb(2)-O(2W)    | 72.06(8)  |
| O(2)#3-Tb(1)-O(20) | 237.05(9) | O(5)-Tb(2)-O(4W)    | 83.53(8)  |
| O(10)-Tb(1)-O(2)#3 | 68.70(8)  | O(5)-Tb(2)-O(3W)    | 142.20(8) |
| O(10)-Tb(1)-O(20)  | 123.14(9) | O(2W)-Tb(2)-O(14)#2 | 124.65(8) |
| O(1W)-Tb(1)-O(2)#3 | 75.81(8)  | O(4W)-Tb(2)-O(14)#2 | 71.44(9)  |
| O(1W)-Tb(1)-O(10)  | 74.39(8)  | O(4W)-Tb(2)-O(2W)   | 71.66(9)  |
| O(1W)-Tb(1)-O(20)  | 69.95(8)  | O(3W)-Tb(2)-O(8)#1  | 144.56(8) |
| O(1W)-Tb(1)-O(19)  | 95.56(9)  | O(3W)-Tb(2)-O(6)#1  | 84.59(9)  |
| O(19)-Tb(1)-O(2)#3 | 139.77(9) | O(3W)-Tb(2)-O(14)#2 | 72.16(8)  |
| O(19)-Tb(1)-O(10)  | 71.12(9)  | O(3W)-Tb(2)-O(2W)   | 71.78(9)  |
| O(19)-Tb(1)-O(20)  | 69.97(9)  | O(3W)-Tb(2)-O(4W)   | 95.26(10) |

Symmetry transformations used to generate equivalent atoms: #1 1-x, 1-y, -z; #2 +x, y+1, z-1; #3 -x, 1-y, 1-z.

**Table S3** Selected bond lengths (Å) and angles (deg) for **2**.

| Bond lengths [Å]    |            |                     |            |
|---------------------|------------|---------------------|------------|
| Y(1)-O(1)           | 2.2760(15) | Y(2)-O(8)#1         | 2.3773(14) |
| Y(1)-O(17)#3        | 2.3543(15) | Y(2)-O(6)#1         | 2.3383(15) |
| Y(1)-O(16)          | 2.3310(14) | Y(2)-O(7)           | 2.2941(15) |
| Y(1)-O(2)#3         | 2.3921(15) | Y(2)-O(5)           | 2.2822(14) |
| Y(1)-O(10)          | 2.3886(15) | Y(2)-O(14)#2        | 2.4400(15) |
| Y(1)-O(1W)          | 2.3499(15) | Y(2)-O(2W)          | 2.4095(16) |
| Y(1)-O(20)          | 2.4141(16) | Y(2)-O(4W)          | 2.3726(17) |
| Y(1)-O(19)          | 2.3526(17) | Y(2)-O(3W)          | 2.3276(15) |
| Angles [deg]        |            |                     |            |
| O(1)-Y(1)-O(17)#3   | 78.37(5)   | O(8)#1-Y(2)-O(14)#2 | 72.81(5)   |
| O(1)-Y(1)-O(16)     | 72.09(5)   | O(8)#1-Y(2)-O(2W)   | 136.83(6)  |
| O(1)-Y(1)-O(2)#3    | 121.34(6)  | O(6)#1-Y(2)-O(8)#1  | 77.02(6)   |
| O(1)-Y(1)-O(10)     | 141.10(5)  | O(6)#1-Y(2)-O(14)#2 | 70.78(6)   |
| O(1)-Y(1)-O(1W)     | 142.11(5)  | O(6)#1-Y(2)-O(2W)   | 143.40(6)  |
| O(1)-Y(1)-O(20)     | 76.47(6)   | O(6)#1-Y(2)-O(4W)   | 140.08(6)  |
| O(1)-Y(1)-O(19)     | 88.53(6)   | O(7)-Y(2)-O(8)#1    | 120.45(6)  |
| O(17)#3-Y(1)-O(2)#3 | 73.68(6)   | O(7)-Y(2)-O(6)#1    | 73.92(6)   |
| O(17)#3-Y(1)-O(10)  | 136.47(5)  | O(7)-Y(2)-O(14)#2   | 137.82(5)  |
| O(17)#3-Y(1)-O(20)  | 73.14(6)   | O(7)-Y(2)-O(2W)     | 75.21(6)   |
| O(16)-Y(1)-O(17)#3  | 126.87 (5) | O(7)-Y(2)-O(4W)     | 145.86(6)  |
| O(16)-Y(1)-O(2)#3   | 85.33 (6)  | O(7)-Y(2)-O(3W)     | 82.29(6)   |
| O(16)-Y(1)-O(10)    | 71.71 (5)  | O(5)-Y(2)-O(8)#1    | 72.66(5)   |
| O(16)-Y(1)-O(1W)    | 145.74(5)  | O(5)-Y(2)-O(6)#1    | 119.37(6)  |
| O(16)-Y(1)-O(20)    | 136.49 (6) | O(5)-Y(2)-O(7)      | 78.30(6)   |
| O(16)-Y(1)-O(19)    | 79.51 (6)  | O(5)-Y(2)-O(14)#2   | 140.05(5)  |
| O(2)#3-Y(1)-O(20)   | 137.43(6)  | O(5)-Y(2)-O(2W)     | 72.15(6)   |
| O(10)-Y(1)-O(2)#3   | 68.99(6)   | O(5)-Y(2)-O(4W)     | 83.39(6)   |

|                    |           |                    |           |
|--------------------|-----------|--------------------|-----------|
| O(10)-Y(1)-O(20)   | 123.51(6) | O(5)-Y(2)-O(3W)    | 142.65(6) |
| O(1W)-Y(1)-O(17)#3 | 75.64(5)  | O(2W)-Y(2)-O(14)#2 | 124.82(6) |
| O(1W)-Y(1)-O(2)#3  | 76.61(6)  | O(4W)-Y(2)-O(8)#1  | 80.06(6)  |
| O(1W)-Y(1)-O(10)   | 74.68(5)  | O(4W)-Y(2)-O(14)#2 | 71.41(6)  |
| O(1W)-Y(1)-O(20)   | 69.91(6)  | O(4W)-Y(2)-O(2W)   | 71.82(6)  |
| O(1W)-Y(1)-O(19)   | 95.99(6)  | O(3W)-Y(2)-O(8)#1  | 144.19(5) |
| O(19)-Y(1)-O(17)#3 | 143.11(6) | O(3W)-Y(2)-O(6)#1  | 84.59(6)  |
| O(19)-Y(1)-O(2)#3  | 140.21(6) | O(3W)-Y(2)-O(14)#2 | 72.20(5)  |
| O(19)-Y(1)-O(10)   | 71.35(6)  | O(3W)-Y(2)-O(2W)   | 72.19(6)  |
| O(19)-Y(1)-O(20)   | 70.29(6)  | O(3W)-Y(2)-O(4W)   | 95.76(7)  |

Symmetry transformations used to generate equivalent atoms:#1 1-x, 1-y, -z; #2 +x, 1+y, -1+z; #3 -x, 1-y, 1-z.

**Table S4** The geometry analysis for complexes **1** and **2** by using SHAPE 2.1 program.

|                     | Complex <b>1</b> |              | Complex <b>2</b> |              |
|---------------------|------------------|--------------|------------------|--------------|
|                     | Tb1              | Tb2          | Y1               | Y2           |
| OP-8 (D8h)          | 28.055           | 29.457       | 28.172           | 29.403       |
| HPY-8 (C7v)         | 23.820           | 24.443       | 24.092           | 24.394       |
| HBPY-8 (D6h)        | 16.178           | 15.814       | 16.129           | 15.890       |
| CU-8 (Oh)           | 10.937           | 10.128       | 10.832           | 10.166       |
| SAPR-8 (D4d)        | 1.288            | 1.058        | 1.205            | 1.024        |
| TDD-8 (D2d)         | 1.669            | 1.409        | 1.622            | 1.412        |
| JGBF-8 (D2d)        | 13.474           | 14.546       | 13.539           | 14.613       |
| JETBPY-8 (D3h)      | 26.701           | 29.325       | 27.007           | 29.217       |
| JBTPR-8 (C2v)       | 1.670            | 1.344        | 1.586            | 1.320        |
| <b>BTPr-8 (C2v)</b> | <b>0.837</b>     | <b>0.772</b> | <b>0.819</b>     | <b>0.789</b> |
| JSD-8 (D2d)         | 3.826            | 3.656        | 3.747            | 3.619        |
| TT-8 (Td)           | 11.679           | 10.808       | 11.547           | 10.832       |
| ETBPY-8 (D3h)       | 21.761           | 24.937       | 22.070           | 25.017       |

OP-8 = Octagon; HPY-8 = Heptagonal pyramid; HBPY-8 = Hexagonal bipyramid; CU-8 = Cube; SAPR-8 = Square antiprism; TDD-8 = Triangular dodecahedron; JGBF-8 = Johnson-gyrobifastigium; JETBPY-8 = Johnson-elongated triangular bipyramid; JBTP-8 = Johnson-biaugmented trigonal prism; BTPr-8 = Biaugmented trigonal prism; JSD-8 = Snub diphenoïd; TT-8 = Triakis tetrahedron; ETBPY-8 = Elongated trigonal bipyramid.

**Table S5** A comparison table summarizing previously reported different materials as sensors, their Stern-Volmer quenching constants (K<sub>sv</sub>), and Limits of Detection (LOD) for the detection of Fe<sup>3+</sup>.

| Materials                   | K <sub>sv</sub>             | LOD/ (μmol·L <sup>-1</sup> ) | Ref. |
|-----------------------------|-----------------------------|------------------------------|------|
| Cd-MOF                      | 99.351 L·mmol <sup>-1</sup> | 0.89                         | 1    |
| [Tb(BTB)(DMF)]              | /                           | 10                           | 2    |
| RhB@DiCH <sub>3</sub> MOF-5 | /                           | 0.36                         | 3    |

|                                                            |                                          |       |           |
|------------------------------------------------------------|------------------------------------------|-------|-----------|
| [Zn <sub>2</sub> (tpt)(tda) <sub>2</sub> ·H <sub>2</sub> O | 4.6*10 <sup>4</sup> L·mmol <sup>-1</sup> | 4.72  | 4         |
| Zn-MOF-74                                                  | /                                        | 1.04  | 5         |
| Eu <sup>3+</sup> @UiO-66                                   | 3.78 × 10 <sup>3</sup> M <sup>-1</sup> , | 12.8  | 6         |
| 1                                                          | 0.00614 L·μmol <sup>-1</sup>             | 31.99 | This work |
| 2                                                          | 0.1231 L·μmol <sup>-1</sup>              | 1.7   | This work |

1. Z. CongYi, L. QinQin, D. MingZhu, F. ChenYang, X. Ye, L. GuangZe and W. SiYu, *Chinese Journal of Inorganic Chemistry* 2023, **39** 2301-2310.
2. H. Xu, H.-C. Hu, C.-S. Cao and B. Zhao, *Inorganic Chemistry*, 2015, **54**, 4585-4587.
3. L. Guo, Y. Liu, R. Kong, G. Chen, Z. Liu, F. Qu, L. Xia and W. Tan, *Analytical Chemistry*, 2019, **91**, 12453-12460.
4. X. Zhuang, X. Zhang, N. Zhang, Y. Wang, L. Zhao and Q. Yang, *Crystal Growth & Design*, 2019, **19**, 5729-5736.
5. J. Wang, Y. Fan, H.-w. Lee, C. Yi, C. Cheng, X. Zhao and M. Yang, *ACS Applied Nano Materials*, 2018, **1**, 3747-3753.
6. L. Li, S. Shen, W. Ai, S. Song, Y. Bai and H. Liu, *Sensors and Actuators B: Chemical*, 2018, **267**, 542-548.
